# Supplementary material for: Homozygous G650del nexilin variant causes cardiomyopathy in mice
Source: PubMed Central journal article supplement (PMC7455123; doi:10.1172/jci.insight.138780), 2020-08-20
Supplement: jciinsight-5-138780-s096.pdf [file jciinsight-5-138780-s096.pdf]

## SUPPLEMENTAL MATERIAL

### Homozygous G650del nexilin variant causes cardiomyopathy in mice

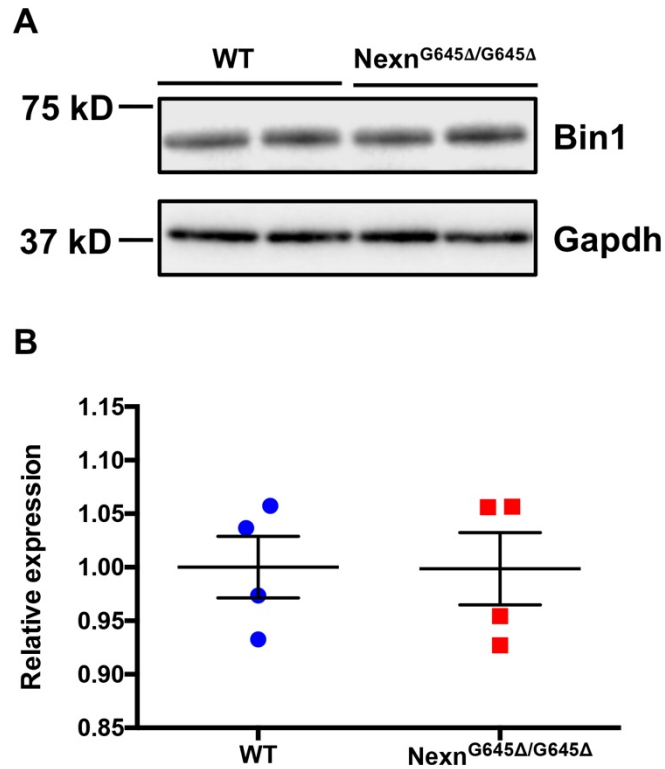

**Figure S1. Bridging Integrator-1 protein level is not altered in *Nexn*<sup>G645Δ/G645Δ</sup> hearts.** (A) WB showing no difference in Bridging Integrator-1(Bin1) expression in *Nexn*<sup>G645Δ/G645Δ</sup> hearts compared to wild type (WT) control mice and (B) relative quantification graph (n= 4, mice age: postnatal day 10).

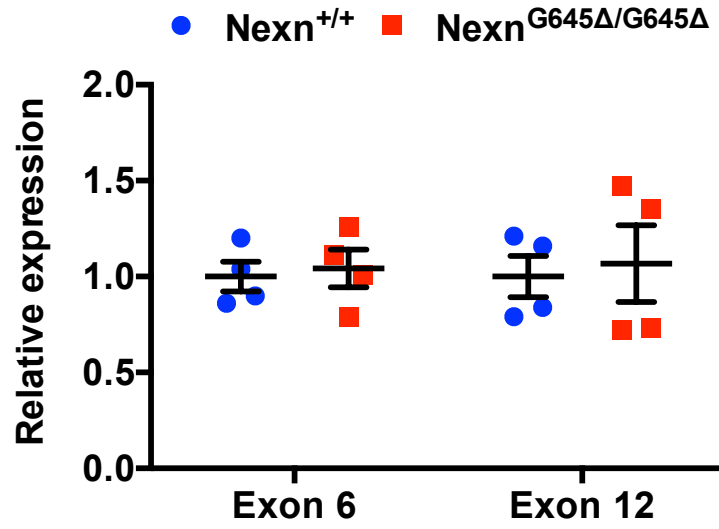

**Figure S2. NEXN mRNA expression in *Nexn*<sup>+/+</sup> and *Nexn*<sup>G645Δ/G645Δ</sup> mice.** Quantitative PCR using primers for exon 6 and 12 of *Nexn* (n= 4, mice age: postnatal day 10).

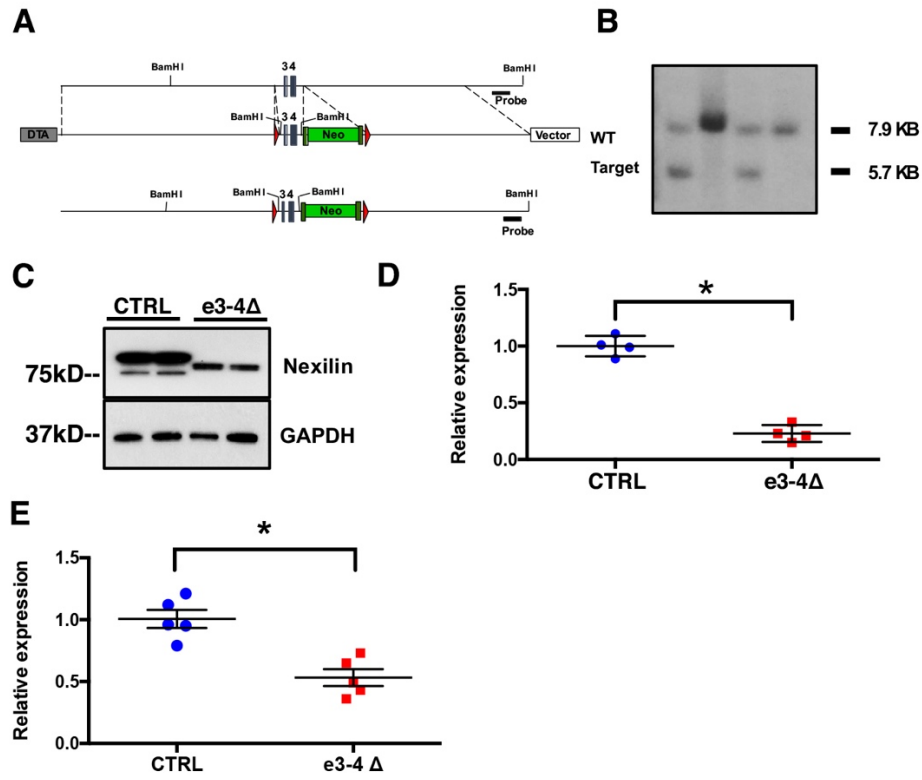

**Figure S3. Deletion of exon 3 and 4 of *Nexn* reduce by 80% NEXN expression level.** Generation of NEXN exon 3 and 4 deletion floxed mice: **(A)** restriction map of the relevant genomic region of NEXN (top), targeting construct (middle), and the mutated locus following recombination (bottom) (DTA, Diphtheria Toxin A chain gene; Neo, neomycin resistance gene) **(B)** PCR showing successful truncation. **(C)** WB showing decreased NEXN expression in heart homozygous for the exon 3 and 4 deletion (e3-4 $\Delta$ ) compared to wild type control mice (CTRL) and **(D)** relative quantification graph (n=4). **(E)** Quantification graph of mRNA expression levels in *Nexn* e3-4 $\Delta$  homozygous mice hearts compared to wild type controls (n=4). Mice age for WB and qPCR analyses is 3 months.

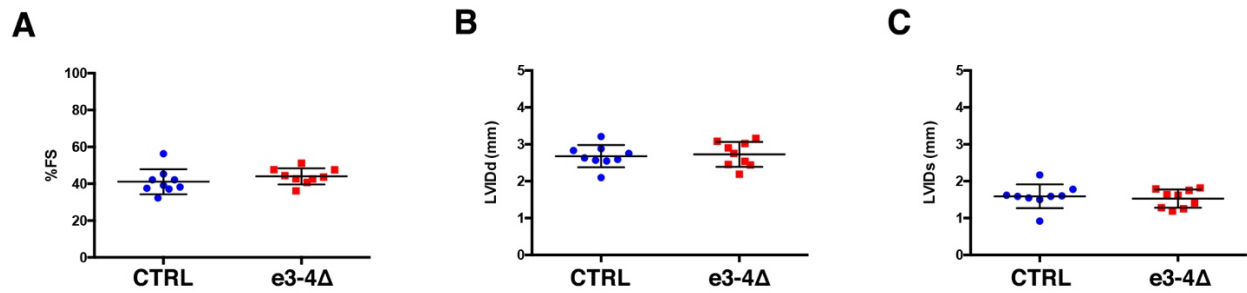

**Figure S4. Deletion of exon 3 and 4 of *Nexn* does not alter cardiac function.** Echocardiography measurements showing no difference between mice homozygous for the exon 3 and 4 deletion (e3-4Δ) and controls (CTRL) in (A) percentage of fractional shortening (%FS), (B) left ventricular dimension in end-diastole (LVIDd) and (C) left ventricular dimension in end-systole (LVIDs). Mice of 3 months of age n>9.

| Primers   | 5' -3'                          | Application                     |
|-----------|---------------------------------|---------------------------------|
| G645 WT-F | 5' -CTTCCCAGAAGATGGAGGA-3'      | Genotyping for wild type allele |
| G645del-F | 5' -CTTCCCAGAAGATGGAGAG-3'      | Genotyping for mutant allele    |
| G645-R    | 5' -AGCATGGTAATGAACCTGATATGC-3' | Genotyping                      |
| Exon6-F   | 5' -GGGAGAACCAACCATGAAGA-3'     | qRT-PCR                         |
| Exon6-R   | 5' -GCTTGCTTCTTGCGATTTTC-3'     | qRT-PCR                         |
| Exon12-F  | 5' -CAAGCCGGAAATTACATGGT-3'     | qRT-PCR                         |
| Exon12-R  | 5' -CTCGCTGCTGAGCCTTTATT-3'     | qRT-PCR                         |
| 18S-F     | 5' -GGAAGGGCACCACCAGGAGT-3'     | qRT-PCR                         |
| 18S-R     | 5' -TGCAGCCCCGGACATCTAAG-3'     | qRT-PCR                         |

**Table S1. Primers used for genotyping and qRT PCR.**

| Antibody | Source, Cat. No        | Antibody | Source, Cat. No      |
|----------|------------------------|----------|----------------------|
| RyR2     | ENZO, ALX-804-016-R100 | NEXN     | Custom antibody      |
| JPH2     | Santa Cruz, sc-51313   | Casq1    | Santa Cruz, sc-28274 |
| Casq2    | Santa Cruz, sc-390999  | SERCA2   | Santa Cruz, sc-73022 |
| LTCC     | Alomone Labs, ACC-003  | GAPDH    | Santa Cruz, sc-32233 |

**Table S2. Antibodies used for western blot.**
